# Supplementary material for: Optimization of Biochar Production by Co-Torrefaction of Microalgae and Lignocellulosic Biomass Using Response Surface Methodology
Source: MDPI journal article supplement (doi:10.3390/en14217330), 2021-11-04
Supplement: s1 [file s1]

# Optimization of Biochar Production by Co-Torrefaction of Microalgae and Lignocellulosic Biomass Using Response Surface Methodology

Catarina Viegas <sup>1,\*</sup>, Catarina Nobre <sup>2</sup>, Ricardo Correia <sup>1</sup>, Luísa Gouveia <sup>3</sup> and Margarida Gonçalves <sup>1</sup>

<sup>1</sup> METRICS, Mechanical Engineering and Resource Sustainability Center, Department of Science and Technology of Biomass, FCT-NOVA, Campus de Caparica, 2829-516 Caparica, Portugal; rjc07189@campus.fct.unl.pt (R.C.); mmpg@fct.unl.pt (M.G.)

<sup>2</sup> CoLAB BIOREF—Collaborative Laboratory for Biorefineries, Rua Amieira Apartado 1089, 4466-901 S. Mamede Infesta, Portugal; catarina-nobre@bioref-colab.pt

<sup>3</sup> LNEG—Laboratório Nacional de Energia e Geologia, I.P./Bioenergy Unit, Estrada do Paço do Lumiar 22, 1649-038 Lisbon, Portugal; luisa.gouveia@lneg.pt

\* Correspondence: cv.sousa@campus.fct.unl.pt

**Table S1.** Experimental design matrix using the RSM modelling technique (Cv – Microalgae sludge, Lc – Lignocellulosic biomass) and corresponding masses of Cv, Lc and water introduced in the reactor.

| Run | Temperature (°C) | Time (min) | Lc Incorporation rate (%) | Moisture content (%) | Cv (g) | Added water (g) | Lc (g) | Total water in feed* (g) | Total feed mass (g) |
|-----|------------------|------------|---------------------------|----------------------|--------|-----------------|--------|--------------------------|---------------------|
| 1   | 300              | 60         | 50                        | 30                   | 3.5    | 4.9             | 10.0   | 5.6                      | 18.4                |
| 2   | 300              | 60         | 25                        | 15                   | 12.0   | 2.2             | 5.0    | 2.9                      | 19.2                |
| 3   | 300              | 60         | 25                        | 15                   | 12.0   | 2.2             | 5.0    | 2.9                      | 19.2                |
| 4   | 300              | 45         | 0                         | 45                   | 11.0   | 8.5             | 0.0    | 8.8                      | 19.5                |
| 5   | 300              | 45         | 100                       | 5                    | 0.0    | 0.0             | 20.0   | 1.0                      | 20.0                |
| 6   | 300              | 45         | 50                        | 5                    | 10.0   | 0.0             | 10.0   | 1.0                      | 20.0                |
| 7   | 300              | 45         | 0                         | 5                    | 20.0   | 0.0             | 0.0    | 1.0                      | 20.0                |
| 8   | 300              | 30         | 50                        | 30                   | 5.5    | 5.6             | 10.0   | 6.4                      | 21.1                |
| 9   | 300              | 15         | 25                        | 45                   | 5.2    | 7.5             | 5.0    | 8.0                      | 17.7                |
| 10  | 300              | 15         | 0                         | 45                   | 11.0   | 8.0             | 0.0    | 8.6                      | 19.0                |
| 11  | 300              | 15         | 50                        | 5                    | 10.0   | 0.0             | 10.0   | 1.0                      | 20.0                |
| 12  | 275              | 60         | 0                         | 70                   | 7.0    | 15.2            | 0.0    | 15.6                     | 22.2                |
| 13  | 275              | 45         | 25                        | 30                   | 8.5    | 4.9             | 5.0    | 5.6                      | 18.4                |
| 14  | 250              | 60         | 0                         | 15                   | 16.0   | 1.9             | 0.0    | 2.7                      | 17.9                |
| 15  | 250              | 60         | 50                        | 5                    | 10.0   | 0.0             | 10.0   | 1.0                      | 20.0                |
| 16  | 250              | 45         | 50                        | 30                   | 3.5    | 4.9             | 10.0   | 5.6                      | 18.4                |
| 17  | 250              | 45         | 25                        | 30                   | 8.5    | 4.9             | 5.0    | 5.6                      | 18.4                |
| 18  | 250              | 45         | 25                        | 30                   | 8.5    | 4.9             | 5.0    | 5.6                      | 18.4                |
| 19  | 250              | 45         | 25                        | 15                   | 12.0   | 2.0             | 5.0    | 2.9                      | 19.0                |
| 20  | 250              | 45         | 25                        | 15                   | 12.0   | 2.0             | 5.0    | 2.9                      | 19.0                |
| 21  | 250              | 30         | 25                        | 45                   | 5.2    | 7.5             | 5.0    | 8.0                      | 17.7                |
| 22  | 250              | 30         | 25                        | 45                   | 5.2    | 7.5             | 5.0    | 8.0                      | 17.7                |
| 23  | 250              | 30         | 50                        | 15                   | 8.0    | 2.2             | 10.0   | 3.1                      | 20.2                |
| 24  | 250              | 30         | 25                        | 5                    | 15.0   | 0.0             | 5.0    | 1.0                      | 20.0                |
| 25  | 250              | 15         | 50                        | 30                   | 5.5    | 5.6             | 10.0   | 6.4                      | 21.1                |
| 26  | 250              | 15         | 0                         | 5                    | 20.0   | 0.0             | 0.0    | 1.0                      | 20.0                |
| 27  | 250              | 15         | 0                         | 5                    | 20.0   | 0.0             | 0.0    | 1.0                      | 20.0                |
| 28  | 225              | 60         | 25                        | 5                    | 15.0   | 0.0             | 5.0    | 1.0                      | 20.0                |
| 29  | 225              | 45         | 0                         | 45                   | 11.0   | 8.0             | 0.0    | 8.6                      | 19.0                |
| 30  | 225              | 15         | 25                        | 15                   | 12.0   | 2.0             | 5.0    | 2.9                      | 19.0                |
| 31  | 200              | 60         | 25                        | 45                   | 5.2    | 7.5             | 5.0    | 8.0                      | 17.7                |
| 32  | 200              | 60         | 50                        | 30                   | 5.5    | 5.6             | 10.0   | 6.4                      | 21.1                |
| 33  | 200              | 60         | 0                         | 5                    | 20.0   | 0.0             | 0.0    | 1.0                      | 20.0                |
| 34  | 200              | 30         | 25                        | 15                   | 12.0   | 2.0             | 5.0    | 2.9                      | 19.0                |
| 35  | 200              | 30         | 25                        | 15                   | 12.0   | 2.0             | 5.0    | 2.9                      | 19.0                |
| 36  | 200              | 30         | 50                        | 5                    | 10.0   | 0.0             | 10.0   | 1.0                      | 20.0                |
| 37  | 200              | 15         | 0                         | 70                   | 7.0    | 15.2            | 0.0    | 15.6                     | 22.2                |
| 38  | 200              | 15         | 50                        | 30                   | 3.5    | 4.9             | 10.0   | 5.6                      | 18.4                |
| 39  | 200              | 15         | 25                        | 30                   | 8.5    | 4.9             | 5.0    | 5.6                      | 18.4                |

\*Total water in feed corresponds to the sum of the added water and the residual moisture present in the Cv and Lc biomasses introduced in the reactor.

**Table S2.** Equations generated by RSM software, with R<sup>2</sup>, Adjusted R<sup>2</sup>, Predicted R<sup>2</sup> and Adequate Precision for product yields

| Parameter                  | Equation **                                                                                                                                                                                                                                | Model F-value | R <sup>2</sup>     | Adjusted R <sup>2</sup> | Predicted R <sup>2</sup> | Adequate Precision |
|----------------------------|--------------------------------------------------------------------------------------------------------------------------------------------------------------------------------------------------------------------------------------------|---------------|--------------------|-------------------------|--------------------------|--------------------|
| <b>Char Yield</b>          | $86.52 + 0.40 T - 0.62 t - 2.10 M + 0.14 I + 3.97 \times 10^{-3} (T \times M) - 1.53 \times 10^{-3} (T \times I) - 1.26 \times 10^{-3} (T^2) + 4.20 \times 10^{-3} (t^2) + 5.34 \times 10^{-3} (M^2) + 1.52 \times 10^{-3} (I^2)$          | 130.00        | 0.980              | 0.973                   | 0.950                    | 40.754             |
| <b>Condensate Yield</b>    | $-1.10 + 0.01 T - 0.30 t + 0.10 M + 9.70 \times 10^{-5} I - 1.20 \times 10^{-4} (T \times M) - 2.70 \times 10^{-4} (t \times M) - 5.39 \times 10^{-4} (M^2)$                                                                               | 26.19         | 0.859              | 0.827                   | 0.698                    | 16.900             |
| <b>Gas Yield</b>           | $-24.66 + 0.16 T + 0.24 t + 0.43 M - 0.07 I - 1.80 \times 10^{-3} (T \times t) - 3.28 \times 10^{-3} (T \times M) - 9.92 \times 10^{-3} (t \times M) - 1.40 \times 10^{-3} (M \times I)$                                                   | 5.53          | 0.604 <sup>1</sup> | 0.595                   | 0.340                    | 9.911              |
| <b>Aqueous Phase Yield</b> | $-1.87 + 3.05 \times 10^{-3} T - 9.29 \times 10^{-3} t + 0.05 M + 0.08 I + 7.50 \times 10^{-5} (T \times t) - 2.20 \times 10^{-5} (t \times I) - 1.30 \times 10^{-5} (M \times I) - 4.42 \times 10^{-4} (M^2) - 5.64 \times 10^{-4} (I^2)$ | 30.58         | 0.908              | 0.878                   | 0.611                    | 27.606             |
| <b>Bio-oil Yield</b>       | $47.98 - 0.45 T + 0.38 t + 0.55 M - 0.42 I - 1.97 \times 10^{-3} (T \times M) + 1.88 \times 10^{-3} (T \times I) - 2.92 (t \times M) + 8.98 \times 10^{-4} (T^2) - 3.14 \times 10^{-3} (t^2)$                                              | 18.98         | 0.864              | 0.818                   | 0.700                    | 18.463             |

Note: p-value model is always 0.01%, and it means that there is only a 0.01% chance that an F-value this large could occur due to noise.

The equations did not undergo any transformations except the Condensate and Aqueous phase equations with a natural log transformation.

The Lak of Fit is not significant (< 4), except for the parameter Bio-oil (Lak of Fit of 6.06)

\*\* Where T, t, M and I means temperature, residence time, moisture and incorporation rate of lignocellulosic material, respectively.

1 – a low R<sup>2</sup> suggests a dispersion of values that decrease the predictability of the model [39].

**Table S3.** Equations generated by RSM software, with R<sup>2</sup>, Adjusted R<sup>2</sup>, Predicted R<sup>2</sup> and Adequate Precision for char characterization

| Parameter                       | Equation **                                                                                                                                                                                                                                                                        | Model F-value | R <sup>2</sup> | Adjusted R <sup>2</sup> | Predicted R <sup>2</sup> | Adeq. Precision |
|---------------------------------|------------------------------------------------------------------------------------------------------------------------------------------------------------------------------------------------------------------------------------------------------------------------------------|---------------|----------------|-------------------------|--------------------------|-----------------|
| <b>Ash</b>                      | $18.09 - 0.16 T + 0.04 t + 0.02 M - 0.02 I - 1.53 \times 10^{-4} (T \times t) - 7.10 \times 10^{-5} (T \times M) + 9.40 \times 10^{-5} (T \times I) - 1.50 \times 10^{-4} (t \times M) - 5.90 \times 10^{-5} (M \times I) + 3.53 \times 10^{-4} (T^2) - 3.03 \times 10^{-4} (I^2)$ | 57.80         | 0.962          | 0.946                   | 0.886                    | 23.239          |
| <b>Volatile Matter</b>          | $-57.02 + 1.12 T - 0.06 t - 0.489 M + 0.39 I - 3.40 \times 10^{-3} (T \times t) + 3.68 \times 10^{-3} (t \times I) + 6.44 \times 10^{-3} (M \times I) - 2.26 \times 10^{-3} (T^2) + 5.52 \times 10^{-3} (t^2) - 3.38 \times 10^{-3} (I^2)$                                         | 41.07         | 0.943          | 0.920                   | 0.874                    | 27.313          |
| <b>Fixed carbon</b>             | $116.76 - 0.80 T - 0.74 t - 0.54 M + 0.16 I + 3.12 \times 10^{-3} (T \times t) + 1.42 \times 10^{-3} (T \times M) - 9.18 \times 10^{-4} (T \times I) + 2.73 \times 10^{-3} (t \times M) + 1.66 \times 10^{-3} (T^2)$                                                               | 80.69         | 0.964          | 0.952                   | 0.920                    | 39.412          |
| <b>O/C ratio</b>                | $0.88 - 1.67 \times 10^{-3} T + 3.46 \times 10^{-3} t + 9.30 \times 10^{-3} M - 1.98 \times 10^{-4} I - 2.60 \times 10^{-5} (T \times t) - 9.50 \times 10^{-5} (M \times I)$                                                                                                       | 60.89         | 0.921          | 0.910                   | 0.871                    | 26.910          |
| <b>H/C ratio</b>                | $2.48 - 3.74 \times 10^{-3} T - 5.96 \times 10^{-3} t + 1.14 \times 10^{-3} M + 1.85 \times 10^{-3} I - 3.10 \times 10^{-5} (T \times t) + 1.13 \times 10^{-4} (t^2)$                                                                                                              | 102.92        | 0.954          | 0.944                   | 0.923                    | 35.734          |
| <b>Char adsorption capacity</b> | $273.18 - 0.80 T - 0.66 t - 2.74 M + 0.20 I + 9.55 \times 10^{-3} (T \times M)$                                                                                                                                                                                                    | 38.40         | 0.857          | 0.835                   | 0.786                    | 19.010          |

Note: p-value model is always 0.01%, and it means that there is only a 0.01% chance that an F-value this large could occur due to noise. The equations did not undergo any transformations except Ash equation with a natural log transformation. The Lak of Fit is not significant (<4), except for parameters Volatile Matter (Lak of Fit of 9.18) and Char adsorption capacity (Lak of Fit of 108.61).

\*\* Where T, t, M and I means temperature, residence time, moisture and incorporation rate of lignocellulosic material, respectively.

**Table S4.** Equations generated by RSM software, with R<sup>2</sup>, Adjusted R<sup>2</sup>, Predicted R<sup>2</sup> and Adequate Precision for Q<sub>input</sub> and Q<sub>output</sub>.

| Parameter           | Equation **                                                                                                                                                                                                                                                                   | Model F-value | R <sup>2</sup> | Adjusted R <sup>2</sup> | Predicted R <sup>2</sup> | Adeq. Precision |
|---------------------|-------------------------------------------------------------------------------------------------------------------------------------------------------------------------------------------------------------------------------------------------------------------------------|---------------|----------------|-------------------------|--------------------------|-----------------|
| Q <sub>input</sub>  | $1.66 + 6.89 \times 10^{-4} T - 4.70 \times 10^{-3} t + 3.36 \times 10^{-2} M + 6.367 \times 10^{-3} I$                                                                                                                                                                       | 59.44         | 0.878          | 0.863                   | 0.821                    | 27.054          |
| Q <sub>output</sub> | $0.38 + 8.30 \times 10^{-5} T - 1.94 \times 10^{-3} t - 8.35 \times 10^{-3} M + 2.19 \times 10^{-3} I + 1.3 \times 10^{-5} (T \times M) - 1.20 \times 10^{-5} (T \times I) - 2.10 \times 10^{-5} (t \times M) + 1.50 \times 10^{-5} (t \times I) + 4.80 \times 10^{-5} (M^2)$ | 193.09        | 0.988          | 0.983                   | 0.972                    | 49.376          |

Note: p-value model is always 0.01%, and it means that there is only a 0.01% chance that an F-value this large could occur due to noise.

The Lak of Fit is not significant (< 4).

\*\* Where T, t, M and I means temperature, residence time, moisture and incorporation rate of lignocellulosic material, respectively.
